# Supplementary material for: Evidence for Public Health Risks of Wastewater and Excreta Management Practices in Southeast Asia: A Scoping Review
Source: PubMed Central journal article supplement (PMC4627004; doi:10.3390/ijerph121012863), 2015-10-15
Supplement: ijerph-12-12863-s001.pdf [file ijerph-12-12863-s001.pdf]

## Evidence for Public Health Risks of Wastewater and Excreta Management Practices in Southeast Asia: A Scoping Review

**Table S1.** Relevant Vietnamese articles hand-searched from Vietnam Journal of Public Health and Vietnam Journal of Preventative Medicine.

| Author/<br>Year                 | Area of<br>study                                                            | Year<br>(study) | Target<br>Group                                                    | Practice                  | Study Design                                 | Health risk Concluded<br>from Study                                                                                                                                                                                                                                               |
|---------------------------------|-----------------------------------------------------------------------------|-----------------|--------------------------------------------------------------------|---------------------------|----------------------------------------------|-----------------------------------------------------------------------------------------------------------------------------------------------------------------------------------------------------------------------------------------------------------------------------------|
| Khuong<br><i>et al.</i><br>2011 | Kim Bang,<br>Ha Nam<br>Province                                             | 2009            | People<br>engaged in<br>wastewater<br>or excreta<br>managemen<br>t | Wastewater<br>and excreta | Quantitative<br>microbial risk<br>assessment | Occupational exposure to<br>wastewater and excreta<br>resulted in diarrhea risk by<br><i>Escherichia coli</i> to be 11<br>times, by <i>G. lamblia</i> to be<br>210 times, and by <i>C.</i><br><i>parvum</i> to be 3 times higher<br>than the acceptable risks<br>proposed by WHO. |
| Dam <i>et al.</i> 2011          | Ha Nam<br>Province                                                          | 2009            | People<br>engaged in<br>wastewater<br>managemen<br>t               | Wastewater                | Microbial<br>testing                         | <i>E. coli</i> counts in samples of<br>wastewater exceeded<br>standard values for<br>agricultural use; Humans<br>may be at risk to <i>E. coli</i><br>infection through<br>wastewater                                                                                              |
| Tu <i>et al.</i><br>2011        | Hoang Tay<br>and Nhat<br>Tan<br>commune,<br>Kim Bang,<br>Ha Nam<br>Province | 2008            | Community<br>members                                               | Wastewater                | Cross-sectional                              | Farmers perceived health<br>risks of wastewater as<br>non-serious (e.g., skin<br>problems) so they didn't use<br>protective equipment;<br>consuming fishes and<br>vegetable from Nhue river<br>may cause diarrhea.                                                                |
| Thanh<br><i>et al.</i><br>2011  | Hoang Tay<br>and Nhat<br>Tan<br>commune,<br>Kim Bang,<br>Ha Nam<br>Province | 2005            | Head of<br>household                                               | Wastewater                | Cross-sectional                              | The results showed that<br>using dirty water and<br>unhygienic latrines would<br>increase the risk getting<br>disease (e.g., diarrhea,<br>helminth, skin,<br>gynecological, food<br>poisoning, and sore eyes).                                                                    |

Table S1. *Cont.*

| Author/<br>Year          | Area of<br>study      | Year<br>(study) | Target<br>Group                                  | Practice   | Study Design | Health risk Concluded<br>from Study                                                                                                                                                                                                                      |
|--------------------------|-----------------------|-----------------|--------------------------------------------------|------------|--------------|----------------------------------------------------------------------------------------------------------------------------------------------------------------------------------------------------------------------------------------------------------|
| Trang <i>et al.</i> 2011 | Hanoi and<br>Nam Dinh | N/A             | People<br>engaged in<br>wastewater<br>management | Wastewater | Case-control | Wastewater exposure, poor sanitation and personal hygiene were risk factors for diarrhea disease. Risk factors for skin diseases include wastewater contact, wastewater-related cultivations, being female and absence of personal protective equipment. |

## References

1. Trang, D.T.; Hien, B.T.T.H.; Cam, P.D.; Tuan, N.D.; Molbak, K.; van der Hoek, W.; Dalsgaard A. 2011. Health risks associated with wastewater use in agriculture and aquaculture in periurban areas in Vietnam. *Vietnam J. Public Health* **2011**, *22*, 21–28.
2. Khuong, N.C.; Bich, T.H.; Phuc, P.D.; Viet-Hung, N. Assessment of diarrhea risk by microorganisms in wastewater and excreta used in agriculture in Hanam. *Vietnam J. Public Health* **2011**, *22*, 14–20.
3. Tranh, N.H.; Minh, H.V.; Hung-Viet, N. Relationship between self-reported health status and the condition of water and sanitation in Hoang Tay and Nhat Tan communes, Kim Bang district, Ha Nam province. *Vietnam J. Public Health* **2011**, *22*, 46–52.
4. Dam, L.; Hung-Viet, N.; Cam, P.D.; Mollby, R. The spread and antibiotic resistance of *Escherichia coli* from wastewater in Hanam. *Vietnam J. Public Health* **2011**, *22*, 37–45.
5. Tu, V.V.; Huong, N.T.; Phuc, P.D.; Hung-Viet, N.; Zurbrugg C. Developing a questionnaire to measure awareness and behaviours of people in relation to wastewater use in agriculture at Hoang Tay commune and Nhat Tan commune, Ha Nam province following Protection Motivation Theory. *Vietnam J. Public Health* **2011**, *22*, 67–72.
